# Supplementary material
Source: MDPI journal article supplement (https://www.mdpi.com/2075-163X/10/7/598)
Supplement: s1 [file s1]

## Sheet: Fig. S1
Figure S1: (A) Evolution of rainfall and streamflow during the hydrological year 2017/18. (B) Detailed evolution of discharge daily increase from June 4th to 8th (corresponding to the inner square in (A))

## Sheet: Fig. S2
Figure S2: Evolution of dissolved concentrations in 2017/18 for all studied elements

## Sheet: Fig. S3
Figure S3: Evolution of saturation indices for some secondary minerals precipitating from AMD in 2017/18. Schwertmannite (a) corresponds to the equilibrium constant from [41] and schwertmannite (b) to the equilibrium constant from [40]

## Sheet: Fig. S4
Figure S4: Evolution of the Cu/Zn ratio in the year 2017/18

## Sheet: Fig. S5
Figure S5: Evolution of dissolved concentrations of As, Cd, Cu, Fe, Mn, Pb, SO4, and Zn from 1980 to 2019 (a potential trend line for each element is shown).
